# Supplementary material for: A DNA Methylation Network Interaction Measure, and Detection of Network Oncomarkers
Source: PubMed Central journal article supplement (PMC3882261; doi:10.1371/journal.pone.0084573), 2014-01-06
Supplement: pone.0084573.s002.pdf [file pone.0084573.s002.pdf]

(a)

| Gene/node  | Degree | Chr | Gene info                                                                                                     |
|------------|--------|-----|---------------------------------------------------------------------------------------------------------------|
| MRPL24     | 7      | 1   | mitochondrial ribosomal protein L24                                                                           |
| UQCRCFS1   | 3      | 19  | ubiquinol-cytochrome c reductase, Rieske iron-sulfur polypeptide 1                                            |
| MRPL15     | 3      | 8   | mitochondrial ribosomal protein L15                                                                           |
| DNAJA3     | 2      | 16  | DnaJ (Hsp40) homolog, subfamily A, member 3                                                                   |
| DLD        | 1      | 7   | dihydrolipoamide dehydrogenase                                                                                |
| ETFA       | 1      | 15  | electron-transfer-flavoprotein, alpha polypeptide                                                             |
| ISCA1      | 1      | 9   | iron-sulfur cluster assembly 1 homolog ( <i>S. cerevisiae</i> )                                               |
| MRPL44     | 1      | 2   | mitochondrial ribosomal protein L44                                                                           |
| MRPS23     | 1      | 17  | mitochondrial ribosomal protein S23                                                                           |
| MRPS5      | 1      | 2   | mitochondrial ribosomal protein S5                                                                            |
| VDAC3      | 1      | 8   | voltage-dependent anion channel 3                                                                             |
| MRPS35     | 1      | 12  | mitochondrial ribosomal protein S35                                                                           |
| ST6GALNAC6 | 1      | 9   | ST6 (alpha-N-acetyl-neuraminyl-2,3-beta-galactosyl-1,3)-N-acetylgalactosaminide alpha-2,6-sialyltransferase 6 |

(b)

| Gene set                                    | OR (95% C.I.) | q-val   |
|---------------------------------------------|---------------|---------|
| MIPS_55S_RIBOSOME_MITOCHONDRIAL             | 190 (51-690)  | 1.8e-07 |
| MOOTHA_HUMAN_MITODB_6_2002                  | 53 (15-210)   | 2.6e-06 |
| MOOTHA_MITOCHONDRIA                         | 51 (15-200)   | 2.6e-06 |
| MIPS_28S_RIBOSOMAL_SUBUNIT_MITOCHONDRIAL    | 150 (24-670)  | 0.0064  |
| MITOCHONDRIAL_PART                          | 50 (11-180)   | 0.0065  |
| MITOCHONDRION                               | 29 (7.3-100)  | 0.0065  |
| MIPS_39S_RIBOSOMAL_SUBUNIT_MITOCHONDRIAL    | 120 (20-530)  | 0.0065  |
| MITOCHONDRIAL_MATRIX                        | 98 (16-410)   | 0.0091  |
| MITOCHONDRIAL_LUMEN                         | 98 (16-410)   | 0.0091  |
| STEIN_ESRRA_TARGETS_UP                      | 24 (6.1-83)   | 0.011   |
| CHIANG_LIVER_CANCER_SUBCLASS_UNANNOTATED_DN | 34 (7.5-120)  | 0.015   |
| MOOTHA_PGC                                  | 21 (5.2-72)   | 0.018   |
| STEIN_ESRRA_TARGETS                         | 17 (4.2-58)   | 0.043   |

(a) Gene/node details, and (b) significantly enriched gene sets, for the mitochondrial module found as significant in the LUAD data set.  $Q$ -values in (b) indicate significance of enrichment in the corresponding gene set by the genes in this module, calculated according to a one-sided Fisher's exact test. Further details about these gene sets can be found from the website of the Broad Institute Molecular Signatures Database (<http://www.broadinstitute.org>).
