# Supplementary material for: A DNA Methylation Network Interaction Measure, and Detection of Network Oncomarkers
Source: PubMed Central journal article supplement (PMC3882261; doi:10.1371/journal.pone.0084573), 2014-01-06
Supplement: pone.0084573.s003.pdf [file pone.0084573.s003.pdf]

(a)

| Gene/node | Degree | Chr | Gene info                                                                 |
|-----------|--------|-----|---------------------------------------------------------------------------|
| MAPK14    | 16     | 6   | mitogen-activated protein kinase 14                                       |
| SRC       | 2      | 20  | v-src sarcoma (Schmidt-Ruppin A-2) viral oncogene homolog (avian)         |
| CCDC14    | 1      | 3   | coiled-coil domain containing 14                                          |
| CCDC97    | 1      | 19  | coiled-coil domain containing 97                                          |
| DUSP16    | 1      | 12  | dual specificity phosphatase 16                                           |
| DUSP22    | 1      | 6   | dual specificity phosphatase 22                                           |
| DUSP6     | 1      | 12  | dual specificity phosphatase 6                                            |
| EEF2K     | 1      | 16  | eukaryotic elongation factor-2 kinase                                     |
| FGR       | 1      | 1   | Gardner-Rasheed feline sarcoma viral (v-fgr) oncogene homolog             |
| GMFB      | 1      | 14  | glia maturation factor, beta                                              |
| KLK3      | 1      | 19  | kallikrein-related peptidase 3                                            |
| MAP3K3    | 1      | 17  | mitogen-activated protein kinase kinase kinase 3                          |
| MAP4K3    | 1      | 2   | mitogen-activated protein kinase kinase kinase 3                          |
| MLL3      | 1      | 7   | myeloid/lymphoid or mixed-lineage leukemia 3                              |
| NFATC2    | 1      | 20  | nuclear factor of activated T-cells, cytoplasmic, calcineurin-dependent 2 |
| P2RY1     | 1      | 3   | purinergic receptor P2Y, G-protein coupled, 1                             |
| PI4K2B    | 1      | 4   | phosphatidylinositol 4-kinase type 2 beta                                 |
| STK39     | 1      | 2   | serine threonine kinase 39                                                |

(b)

| Gene set                                    | OR (95% C.I.) | q-val   |
|---------------------------------------------|---------------|---------|
| PID_P38ALPHABETAPATHWAY                     | 140 (35-450)  | 2.1e-05 |
| PROTEIN_KINASE_CASCADE                      | 25 (8-71)     | 0.00075 |
| MAPKKK_CASCADE_GO_0000165                   | 42 (11-130)   | 0.0016  |
| INACTIVATION_OF_MAPK_ACTIVITY               | 190 (30-860)  | 0.0035  |
| NEGATIVE_REGULATION_OF_MAP_KINASE_ACTIVITY  | 150 (25-680)  | 0.0039  |
| KEGG_MAPK_SIGNALING_PATHWAY                 | 21 (6.3-60)   | 0.0039  |
| INTRACELLULAR_SIGNALING_CASCADE             | 13 (4.4-37)   | 0.0043  |
| REACTOME_ADP_SIGNALLING_THROUGH_P2RY1       | 120 (20-510)  | 0.0054  |
| REACTOME_SIGNAL_AMPLIFICATION               | 90 (15-360)   | 0.011   |
| NEGATIVE_REGULATION_OF_TRANSFERASE_ACTIVITY | 68 (12-260)   | 0.021   |
| CELLULAR_PROTEIN_METABOLIC_PROCESS          | 8.4 (2.9-24)  | 0.049   |
| CELLULAR_MACROMOLECULE_METABOLIC_PROCESS    | 8.3 (2.9-24)  | 0.049   |

(a) Gene/node details, and (b) significantly enriched gene sets, for the MAP-kinase module found as significant in the LUSC data set.  $Q$ -values in (b) indicate significance of enrichment in the corresponding gene set by the genes in this module, calculated according to a one-sided Fisher's exact test. Further details about these gene sets can be found from the website of the Broad Institute Molecular Signatures Database (<http://www.broadinstitute.org>).
