# Supplementary material for: A DNA Methylation Network Interaction Measure, and Detection of Network Oncomarkers
Source: PubMed Central journal article supplement (PMC3882261; doi:10.1371/journal.pone.0084573), 2014-01-06
Supplement: pone.0084573.s004.pdf [file pone.0084573.s004.pdf]

(a)

| Gene/node | Degree | Chr | Gene info                                                                                  |
|-----------|--------|-----|--------------------------------------------------------------------------------------------|
| BSG       | 8      | 19  | basigin (Ok blood group)                                                                   |
| ATXN10    | 1      | 22  | ataxin 10                                                                                  |
| ELTD1     | 1      | 1   | EGF, latrophilin and seven transmembrane domain containing 1                               |
| HGSNAT    | 1      | 8   | heparan-alpha-glucosaminide N-acetyltransferase                                            |
| NPC1      | 1      | 18  | Niemann-Pick disease, type C1                                                              |
| PPIB      | 1      | 15  | peptidylprolyl isomerase B (cyclophilin B)                                                 |
| SDC1      | 1      | 2   | syndecan 1                                                                                 |
| SLC16A4   | 1      | 1   | solute carrier family 16, member 4 (monocarboxylic acid transporter 5)                     |
| SLC3A2    | 1      | 11  | solute carrier family 3 (activators of dibasic and neutral amino acid transport), member 2 |

(b)

| Gene set               | OR (95% C.I.) | <i>q</i> -val |
|------------------------|---------------|---------------|
| PID_SYNDECAN_1_PATHWAY | 140 (21-680)  | 0.04          |

(a) Gene/node details, and (b) significantly enriched gene sets, for the largest biologically significant module in the BLCA data set. *Q*-values in (b) indicate significance of enrichment in the corresponding gene set by the genes in this module, calculated according to a one-sided Fisher's exact test. Further details about these gene sets can be found from the website of the Broad Institute Molecular Signatures Database (<http://www.broadinstitute.org>).
