# Supplementary material for: A DNA Methylation Network Interaction Measure, and Detection of Network Oncomarkers
Source: PubMed Central journal article supplement (PMC3882261; doi:10.1371/journal.pone.0084573), 2014-01-06
Supplement: pone.0084573.s005.pdf [file pone.0084573.s005.pdf]

(a)

| Gene/node | Degree | Chr | Gene info                              |
|-----------|--------|-----|----------------------------------------|
| ALPP      | 3      | 2   | alkaline phosphatase, placental        |
| AZU1      | 2      | 19  | azurocidin 1                           |
| MPO       | 2      | 17  | myeloperoxidase                        |
| ARL8B     | 2      | 3   | ADP-ribosylation factor-like 8B        |
| ALPPL2    | 1      | 2   | alkaline phosphatase, placental-like 2 |

(b)

| Gene set                          | OR (95% C.I.)      | <i>q</i> -val |
|-----------------------------------|--------------------|---------------|
| MARTINELLI_IMMATURE_NEUTROPHIL_UP | 2300 (140-4.5e+15) | 0.014         |
| KEGG_FOLATE_BIOSYNTHESIS          | 920 (65-8200)      | 0.032         |

(a) Gene/node details, and (b) significantly enriched gene sets, for the largest biologically significant module in the BRCA data set. *Q*-values in (b) indicate significance of enrichment in the corresponding gene set by the genes in this module, calculated according to a one-sided Fisher's exact test. Further details about these gene sets can be found from the website of the Broad Institute Molecular Signatures Database (<http://www.broadinstitute.org>).
