# Supplementary material for: A DNA Methylation Network Interaction Measure, and Detection of Network Oncomarkers
Source: PubMed Central journal article supplement (PMC3882261; doi:10.1371/journal.pone.0084573), 2014-01-06
Supplement: pone.0084573.s006.pdf [file pone.0084573.s006.pdf]

(a)

| Gene/node | Degree | Chr | Gene info                                                                                         |
|-----------|--------|-----|---------------------------------------------------------------------------------------------------|
| ZNF638    | 76     | 2   | zinc finger protein 638                                                                           |
| SF3B4     | 55     | 1   | splicing factor 3b, subunit 4, 49kDa                                                              |
| CPSF1     | 50     | 8   | cleavage and polyadenylation specific factor 1, 160kDa                                            |
| PRPF19    | 41     | 11  | PRP19/PSO4 pre-mRNA processing factor 19 homolog (S. cerevisiae)                                  |
| KPNA1     | 37     | 3   | karyopherin alpha 1 (importin alpha 5)                                                            |
| EPPK1     | 37     | 8   | epiplakin 1                                                                                       |
| PRPF6     | 35     | 20  | PRP6 pre-mRNA processing factor 6 homolog (S. cerevisiae)                                         |
| DDX42     | 34     | 17  | DEAD (Asp-Glu-Ala-Asp) box polypeptide 42                                                         |
| FASN      | 34     | 17  | fatty acid synthase                                                                               |
| HSPA9     | 31     | 5   | heat shock 70kDa protein 9 (mortalin)                                                             |
| PSMC6     | 28     | 14  | proteasome (prosome, macropain) 26S subunit, ATPase, 6                                            |
| CDC27     | 25     | 17  | cell division cycle 27                                                                            |
| SMARCC1   | 24     | 3   | SWI/SNF related, matrix associated, actin dependent regulator of chromatin, subfamily c, member 1 |
| BRWD1     | 23     | 21  | bromodomain and WD repeat domain containing 1                                                     |
| ILF2      | 23     | 1   | interleukin enhancer binding factor 2                                                             |
| GTF3C2    | 23     | 2   | general transcription factor IIIC, polypeptide 2, beta 110kDa                                     |
| CSNK2A1   | 22     | 20  | casein kinase 2, alpha 1 polypeptide                                                              |
| DDX19A    | 22     | 16  | DEAD (Asp-Glu-Ala-Asp) box polypeptide 19A                                                        |
| MED16     | 22     | 19  | mediator complex subunit 16                                                                       |
| POLR2E    | 21     | 19  | polymerase (RNA) II (DNA directed) polypeptide E, 25kDa                                           |
| MYC       | 20     | 8   | v-myc myelocytomatosis viral oncogene homolog (avian)                                             |
| TPX2      | 17     | 20  | TPX2, microtubule-associated, homolog (Xenopus laevis)                                            |
| TMOD3     | 17     | 15  | tropomodulin 3 (ubiquitous)                                                                       |
| RAC2      | 17     | 22  | ras-related C3 botulinum toxin substrate 2 (rho family, small GTP binding protein Rac2)           |
| ACTL6A    | 16     | 3   | actin-like 6A                                                                                     |
| CFL1      | 16     | 11  | cofilin 1 (non-muscle)                                                                            |
| BUB1      | 15     | 2   | BUB1 mitotic checkpoint serine/threonine kinase                                                   |
| ARCN1     | 15     | 11  | archain 1                                                                                         |
| SRP19     | 15     | 5   | signal recognition particle 19kDa                                                                 |
| PRPF8     | 15     | 17  | PRP8 pre-mRNA processing factor 8 homolog (S. cerevisiae)                                         |
| PIK3CA    | 13     | 3   | phosphatidylinositol-4,5-bisphosphate 3-kinase, catalytic subunit alpha                           |
| ERCC3     | 13     | 2   | excision repair cross-complementing rodent repair deficiency, complementation group 3             |
| PAK1      | 12     | 11  | p21 protein (Cdc42/Rac)-activated kinase 1                                                        |
| RPS21     | 12     | 20  | ribosomal protein S21                                                                             |
| ITGA2     | 12     | 5   | integrin, alpha 2 (CD49B, alpha 2 subunit of VLA-2 receptor)                                      |
| NF1       | 12     | 17  | neurofibromin 1                                                                                   |
| PEA15     | 12     | 1   | phosphoprotein enriched in astrocytes 15                                                          |
| PSMB5     | 12     | 14  | proteasome (prosome, macropain) subunit, beta type, 5                                             |

(b)

| Gene set                                                          | OR (95% C.I.) | q-val   |
|-------------------------------------------------------------------|---------------|---------|
| PUJANA_CHEK2_PCC_NETWORK                                          | 3.4 (2.7-4.3) | 1.4e-19 |
| PUJANA_BRCA1_PCC_NETWORK                                          | 2.6 (2.1-3.1) | 1.6e-18 |
| NUCLEUS                                                           | 2.5 (2-3)     | 3.8e-16 |
| NUCLEAR_PART                                                      | 3.1 (2.3-3.9) | 3.6e-12 |
| DIAZ_CHRONIC_MEYLOGENOUS_LEUKEMIA_UP                              | 2.2 (1.8-2.7) | 4.8e-12 |
| NUCLEOBASENUCLEOSIDENUCLEOTIDE_AND_NUCLEIC_ACID_METABOLIC_PROCESS | 2.2 (1.8-2.6) | 4.1e-10 |
| REACTOME_APOPTOSIS                                                | 5 (3.3-7.4)   | 5.6e-10 |
| INTRACELLULAR_ORGANELLE_PART                                      | 2.2 (1.8-2.7) | 1.1e-09 |
| REACTOME_HIV_INFECTION                                            | 4.4 (3-6.3)   | 1.1e-09 |
| ORGANELLE_PART                                                    | 2.2 (1.8-2.7) | 1.2e-09 |
| REACTOME_METABOLISM_OF_RNA                                        | 4.3 (2.9-6.2) | 1.5e-09 |
| REACTOME_METABOLISM_OF_MRNA                                       | 4.7 (3.1-7.1) | 2.2e-09 |
| PILON_KLF1_TARGETS_DN                                             | 1.9 (1.6-2.3) | 3.3e-09 |
| KEGG_SPLICEOSOME                                                  | 5.7 (3.5-9.2) | 8.7e-09 |
| PENG_Glutamine_Deprivation_DN                                     | 3.3 (2.3-4.5) | 1.2e-08 |
| REACTOME_AUTODEGRADATION_OF_CDH1_BY_CDH1_APC_C                    | 9.1 (4.8-17)  | 1.8e-08 |
| MACROMOLECULAR_COMPLEX                                            | 2.2 (1.7-2.7) | 2.7e-08 |
| REACTOME_APC_C_CDH1_MEDIATED_DEGRADATION_OF_CDC20_AND_OTHER       | 7.9 (4.3-14)  | 3.8e-08 |
| APC_C_CDH1_TARGETED_PROTEINS_IN_LATE_MITOSIS_EARLY_G1             |               |         |
| MITSIADIES_RESPONSE_TO_APLIDIN_DN                                 | 3.5 (2.4-5)   | 4.1e-08 |
| BIOPOLYMER_METABOLIC_PROCESS                                      | 1.9 (1.5-2.2) | 4.2e-08 |
| DODD_NASOPHARYNGEAL_CARCINOMA_DN                                  | 2.1 (1.7-2.6) | 4.2e-08 |
| DACOSTA_UV_RESPONSE_VIA_ERCC3_DN                                  | 2.2 (1.7-2.7) | 4.9e-08 |
| RNA_METABOLIC_PROCESS                                             | 2.2 (1.7-2.7) | 8.5e-08 |
| REACTOME_REGULATION_OF_MITOTIC_CELL_CYCLE                         | 6.4 (3.7-11)  | 9.1e-08 |
| REACTOME_APC_C_CDC20_MEDIATED_DEGRADATION_OF_MITOTIC_PROTEINS     | 7.2 (4-13)    | 1.1e-07 |

(a) Gene/node details for the top 5% of the degree distribution, and (b) top 25 most significantly enriched gene sets, for the large subnetwork found as significant in the KIRC data set.  $Q$ -values in (b) indicate significance of enrichment in the corresponding gene set by the genes in this subnetwork, calculated according to a one-sided Fisher's exact test. Further details about these gene sets can be found from the website of the Broad Institute Molecular Signatures Database (<http://www.broadinstitute.org>).
