# Supplementary material for: A DNA Methylation Network Interaction Measure, and Detection of Network Oncomarkers
Source: PubMed Central journal article supplement (PMC3882261; doi:10.1371/journal.pone.0084573), 2014-01-06
Supplement: pone.0084573.s007.pdf [file pone.0084573.s007.pdf]

(a)

| Gene/node | Degree | Chr | Gene info                                                                                 |
|-----------|--------|-----|-------------------------------------------------------------------------------------------|
| YWHAZ     | 16     | 8   | tyrosine 3-monooxygenase/tryptophan 5-monooxygenase activation protein, zeta polypeptide  |
| YWHAG     | 16     | 7   | tyrosine 3-monooxygenase/tryptophan 5-monooxygenase activation protein, gamma polypeptide |
| RAC1      | 14     | 7   | ras-related C3 botulinum toxin substrate 1 (rho family, small GTP binding protein Rac1)   |
| SRC       | 13     | 20  | v-src sarcoma (Schmidt-Ruppin A-2) viral oncogene homolog (avian)                         |
| ELAVL1    | 12     | 19  | ELAV (embryonic lethal, abnormal vision, Drosophila)-like 1 (Hu antigen R)                |
| KHDRBS1   | 9      | 1   | KH domain containing, RNA binding, signal transduction associated 1                       |
| AGK       | 8      | 7   | acylglycerol kinase                                                                       |
| RPLP0     | 8      | 12  | ribosomal protein, large, P0                                                              |
| DDX19B    | 8      | 16  | DEAD (Asp-Glu-Ala-Asp) box polypeptide 19B                                                |
| INTS3     | 8      | 1   | integrator complex subunit 3                                                              |
| ARID5B    | 7      | 10  | AT rich interactive domain 5B (MRF1-like)                                                 |
| CYBA      | 7      | 16  | cytochrome b-245, alpha polypeptide                                                       |
| BZW1      | 7      | 2   | basic leucine zipper and W2 domains 1                                                     |
| MLL2      | 7      | 12  | myeloid/lymphoid or mixed-lineage leukemia 2                                              |
| SNX2      | 7      | 5   | sorting nexin 2                                                                           |

(b)

| Gene set | OR (95% C.I.) | <i>q</i> -val |                                                                                           |
|----------|---------------|---------------|-------------------------------------------------------------------------------------------|
| YWHAZ    | 16            | 8             | tyrosine 3-monooxygenase/tryptophan 5-monooxygenase activation protein, zeta polypeptide  |
| YWHAG    | 16            | 7             | tyrosine 3-monooxygenase/tryptophan 5-monooxygenase activation protein, gamma polypeptide |
| RAC1     | 14            | 7             | ras-related C3 botulinum toxin substrate 1 (rho family, small GTP binding protein Rac1)   |
| SRC      | 13            | 20            | v-src sarcoma (Schmidt-Ruppin A-2) viral oncogene homolog (avian)                         |
| ELAVL1   | 12            | 19            | ELAV (embryonic lethal, abnormal vision, Drosophila)-like 1 (Hu antigen R)                |
| KHDRBS1  | 9             | 1             | KH domain containing, RNA binding, signal transduction associated 1                       |
| AGK      | 8             | 7             | acylglycerol kinase                                                                       |
| RPLP0    | 8             | 12            | ribosomal protein, large, P0                                                              |
| DDX19B   | 8             | 16            | DEAD (Asp-Glu-Ala-Asp) box polypeptide 19B                                                |
| INTS3    | 8             | 1             | integrator complex subunit 3                                                              |
| ARID5B   | 7             | 10            | AT rich interactive domain 5B (MRF1-like)                                                 |
| CYBA     | 7             | 16            | cytochrome b-245, alpha polypeptide                                                       |
| BZW1     | 7             | 2             | basic leucine zipper and W2 domains 1                                                     |
| MLL2     | 7             | 12            | myeloid/lymphoid or mixed-lineage leukemia 2                                              |
| SNX2     | 7             | 5             | sorting nexin 2                                                                           |

(a) Gene/node details for the top 5% of the degree distribution, and (b) top 25 most significantly enriched gene sets, for the large subnetwork found as significant in the LUAD data set. *Q*-values in (b) indicate significance of enrichment in the corresponding gene set by the genes in this subnetwork, calculated according to a one-sided Fisher's exact test.
